# Supplementary material
Source: PubMed Central journal article supplement (PMC7954989)

## **SUPPLEMENTAL INFORMATION**

**Figure S1. MTX alters community composition in individually housed mice, related to Figure 1.**

(A) Alpha diversity of Observed ASVs after treatment with 50 mg/kg MTX (n=4) or PBS (n=3) by oral gavage for 4 days in mice that were individually housed (Wilcoxon rank sum).

(B-C) PCA of Euclidean distances using clr-transformed values at multiple time points after treatment with either PBS (n=3) or MTX (50 mg/kg; n=4) by oral gavage for 4 days in individually housed mice.

(B) Data from multiple days are shown together and lines connect samples from the same mouse; each point is labeled by day of treatment. ANOSIM statistical results comparing Day 0 vs. Day 4 within each treatment group are shown.

(C) Data are split by day, and ANOSIM results comparing PBS vs. MTX are shown for each time point in (C).

(D) The Euclidean distance of clr-transformed abundances between each mouse's fecal community (in individually housed mice) on days 7-18 after colonization with a human microbiome (day 0) compared to itself 3 days after colonization. The biggest differences in the community composition occurs within the first week which is depicted at days 3 and 7 (at day 0, the mice are germ-free, which is why that time point is not included). Oral gavage with MTX or vehicle control was started on day 14 after colonization. The biggest changes in the MTX treated community occur 1-2 days after treatment.

(E) Twenty-three ASVs were differentially abundant in MTX treated mice relative to PBS control ( $p_{adj} < 0.01$ , DESeq). Colors indicate log<sub>2</sub> fold change.

**A**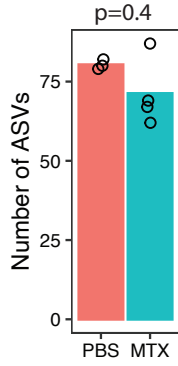**B**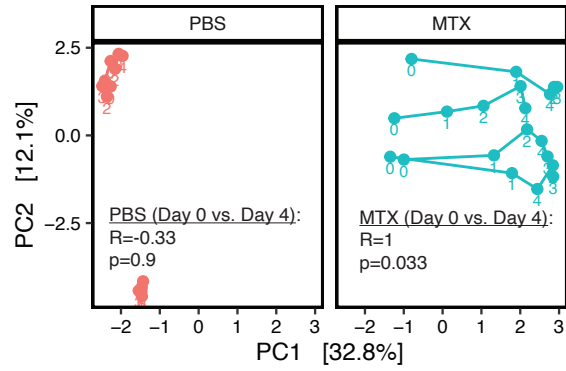**C**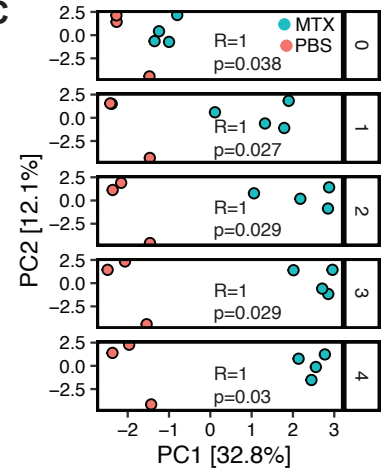**D**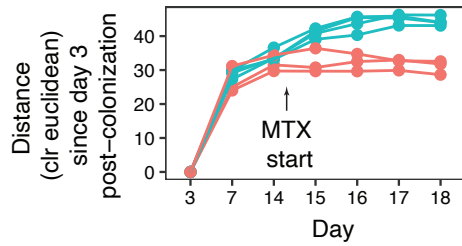**E**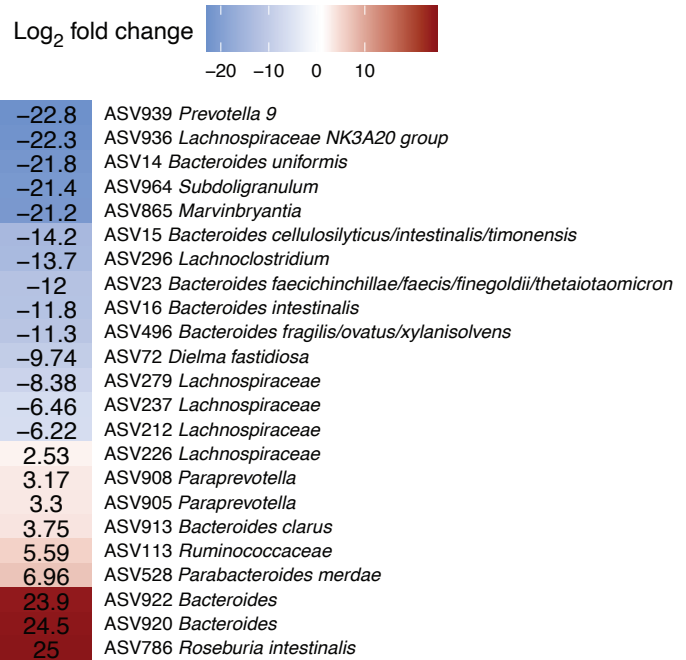

**Figure S2. MTX alters community composition in mice with altered route of MTX or rescue with folic acid, related to Figure 1.**

(A-B) Alpha diversity of Observed ASVs (A) and PCA of Euclidean distances using clr-transformed values (B) at multiple time points after treatment with 50 mg/kg MTX either IP (n=3) or PO (n=3) by oral gavage for 2 days in mice that were co-housed by treatment. ANOSIM statistical results are shown for each time point comparing IP vs. PO treatment.

(C-D) Alpha diversity of Observed ASVs (C) and PCA of Euclidean distances using clr-transformed values (D) at multiple time points after treatment with 50 mg/kg MTX with vehicle control (n=3) or 50 mg/kg folic acid (n=3) by oral gavage for 2 days in mice that were co-housed by treatment. ANOSIM statistical results are shown for each time point comparing vehicle control vs. folic acid supplementation treatment.

(E-F) Phylum-level trends over time (in days) in the route and rescue experiments, where lines depict the median for each treatment group. Shown are significance values from DESeq for significant phyla (Day 0 vs. Day 2,  $p_{adj} < 0.01$ ).

(G) 41 ASVs were differentially abundant in both route and rescue experiments (Day 0 vs. Day 2,  $p_{adj} < 0.01$ ). Colors indicate log<sub>2</sub> fold change.

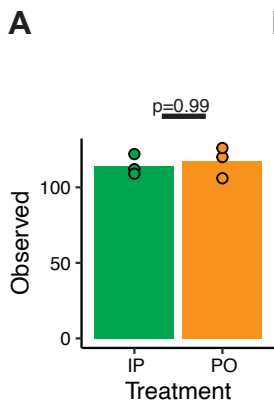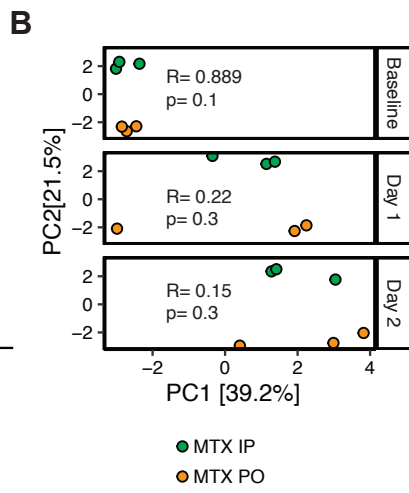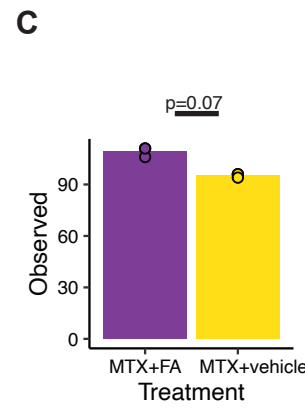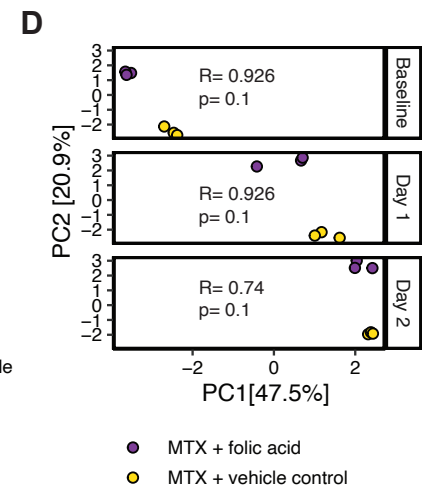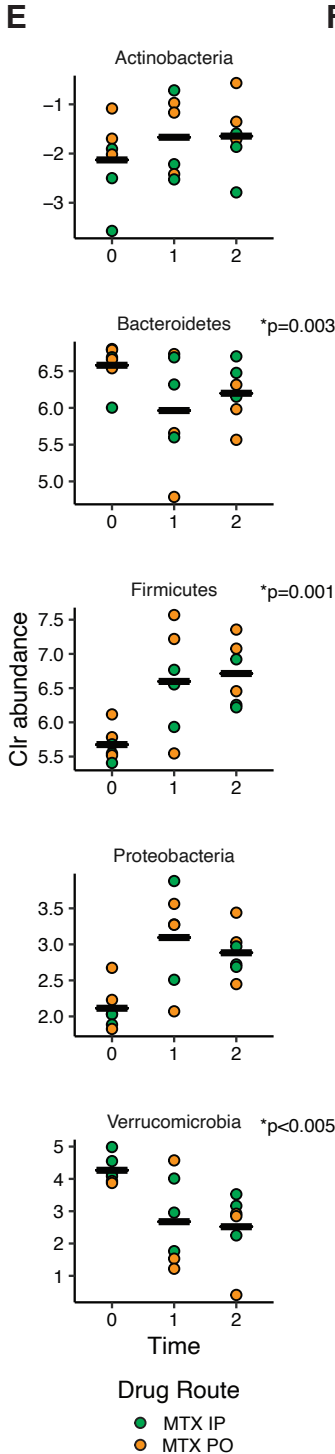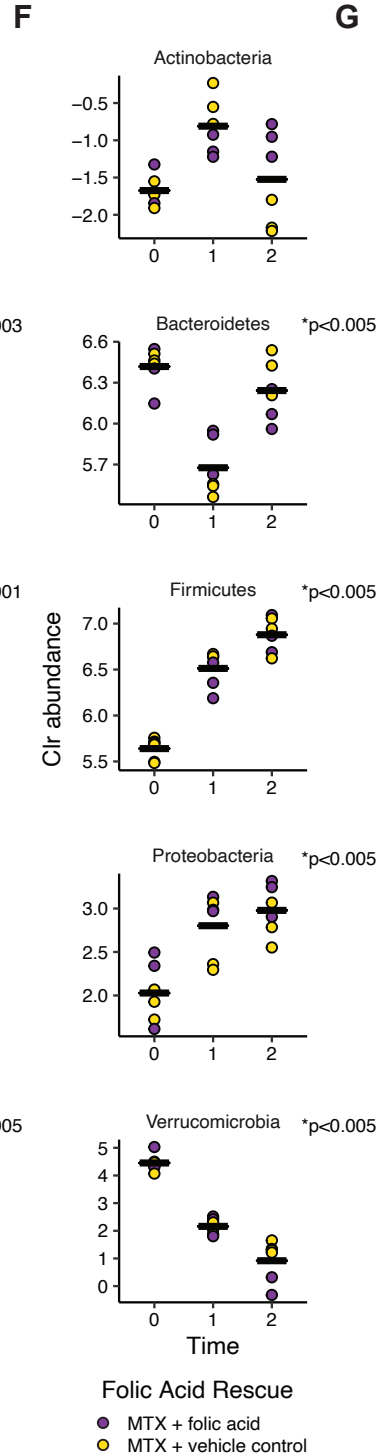

**G**

| ASV    | rescue | route | log2FC |
|--------|--------|-------|--------|
| ASV505 | -11.3  | -11.9 | 5      |
| ASV296 | -11.4  | -11.7 | 5      |
| ASV72  | -10.2  | -9.4  | 5      |
| ASV797 | -9.4   | -9.2  | 5      |
| ASV23  | -14.1  | -9.1  | 5      |
| ASV247 | -7.4   | -8.9  | 5      |
| ASV287 | -9.2   | -8.4  | 5      |
| ASV279 | -7     | -8.4  | 5      |
| ASV863 | -9.6   | -8.2  | 5      |
| ASV303 | -8.1   | -7.7  | 5      |
| ASV802 | -5.1   | -7    | 5      |
| ASV302 | -5.3   | -6.7  | 5      |
| ASV19  | -6.1   | -6.5  | 5      |
| ASV614 | -7.5   | -6.2  | 5      |
| ASV483 | -4.9   | -5.7  | 5      |
| ASV25  | -10    | -5.7  | 5      |
| ASV496 | -5     | -4.7  | 5      |
| ASV85  | -6.8   | -4.4  | 5      |
| ASV16  | -4.9   | -3.9  | 5      |
| ASV522 | -4.6   | -3.6  | 5      |
| ASV26  | -3.8   | -3.2  | 5      |
| ASV569 | -4.6   | -2.5  | 5      |
| ASV241 | -3.3   | -2.5  | 5      |
| ASV44  | -5     | -2.2  | 5      |
| ASV28  | -2.1   | -1.4  | 5      |
| ASV224 | 1.5    | 1     | 5      |
| ASV812 | 1.4    | 1.1   | 5      |
| ASV230 | 1.4    | 1.4   | 5      |
| ASV252 | 1.9    | 1.5   | 5      |
| ASV109 | 1.7    | 2     | 5      |
| ASV708 | 1.6    | 2.2   | 5      |
| ASV204 | 2.1    | 2.5   | 5      |
| ASV74  | 2.5    | 3.4   | 5      |
| ASV9   | 4.3    | 3.4   | 5      |
| ASV40  | 1.9    | 3.5   | 5      |
| ASV528 | 5.2    | 4     | 5      |
| ASV7   | 5.6    | 4.9   | 5      |
| ASV170 | 6.3    | 5.2   | 5      |
| ASV272 | 5.4    | 5.7   | 5      |
| ASV111 | 6.2    | 6.2   | 5      |
| ASV718 | 4.4    | 6.5   | 5      |

rescue route

log2FC

5

0

-5

-10

*Bacteroides*

*Lachnoclostridium*

*Dielma fastidiosa*

*Lachnospiraceae*

*Bacteroides faecichinchillae/faecis/finegoldii/thetaiotaomicron*

*Blautia*

*Lachnospiraceae*

*Lachnospiraceae*

*Blautia obeum*

*Lachnospiraceae*

*Coprococcus\_3 comes*

*Lachnospiraceae*

*Bacteroides fragilis/ovatus*

*Erysipelotrichaceae\_UCG-003*

*Bacteroides*

*Bacteroides massiliensis*

*Bacteroides fragilis/ovatus/xylanisolvans*

Family\_XIII\_UCG-001

*Bacteroides intestinalis*

*Bacteroides uniformis*

*Bacteroides vulgatus*

*Akkermansia muciniphila*

*Blautia henseni/producta*

*Collinsella aerofaciens*

*Odoribacter splanchnicus*

*Eisenbergiella tayi*

*Eisenbergiella*

*Hungatella effluvii/hathewayi*

*Blautia obeum/wexlerae*

*Ruminococcaceae\_UCG-013*

*Ruminococcaceae*

*Iyzzarella*

*Erysipelatoclostridium*

*Alistipes shahii*

*Escherichia/Shigella*

*Parabacteroides merdae*

*Alistipes finegoldii*

*Ruminococcaceae*

*Lactonifactor longoviformis*

*Ruminococcaceae\_UCG-013*

*Ruminiclostridium\_5*

**Figure S3. MTX alters community composition in a combined analysis of gnotobiotic mouse experiments, related to Figure 1.**

(A) Alpha diversity of Observed ASVs from a combined analysis of the dose-response, individually housed, route and rescue gnotobiotic experiments. Mice treated with low-dose MTX were excluded. Significance assessed by two-factor ANOVA.

(B-C) PCA of Euclidean distances using clr-transformed values showing the first vs. second principal components (B) and the second vs. third principal components (C). ANOSIM statistical results are shown for donor effect (B) and MTX treatment effect (C).

(D) Phylum-level trends with MTX treatment, where lines depict the median for each treatment group. Shown are significance values from DESeq for significant phyla ( $p_{adj} < 0.05$ ).

(E) A phylogenetic tree of 61 ASVs were differentially abundant in the combined analysis (with vs. without MTX,  $p_{adj} < 0.05$ ).

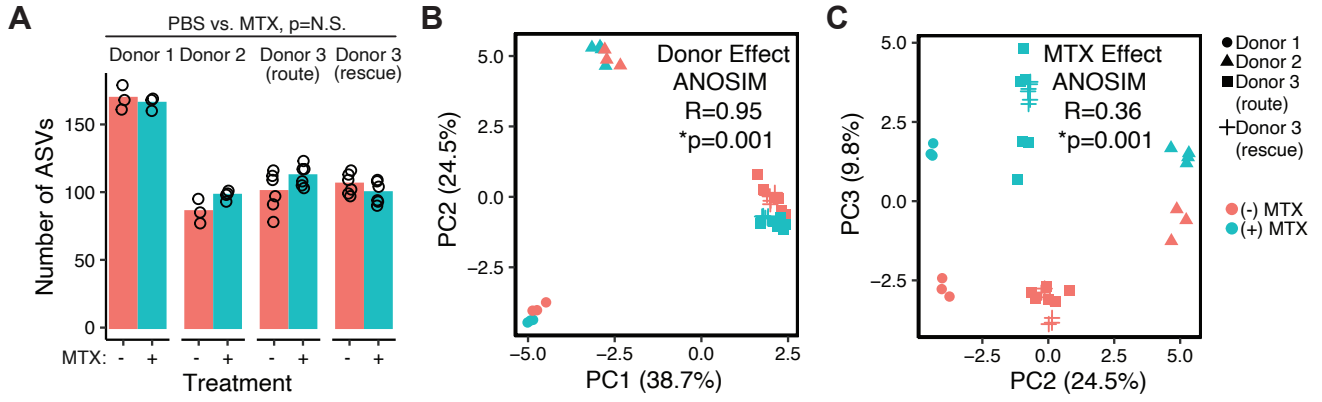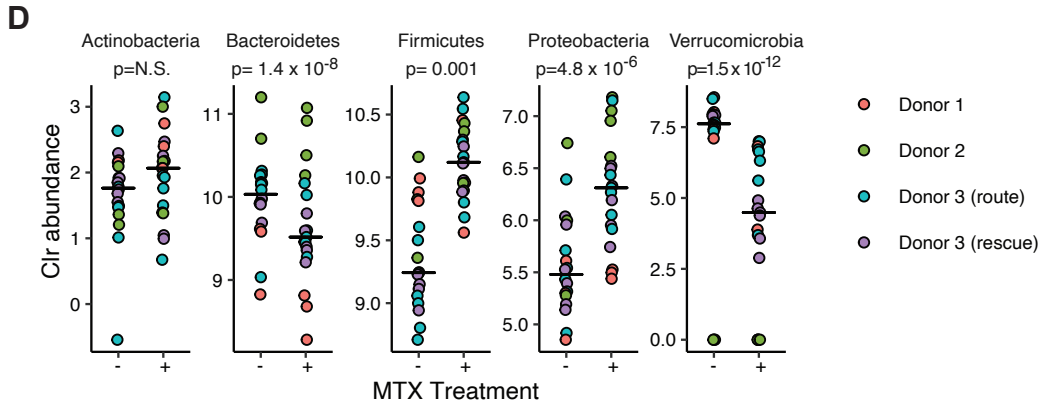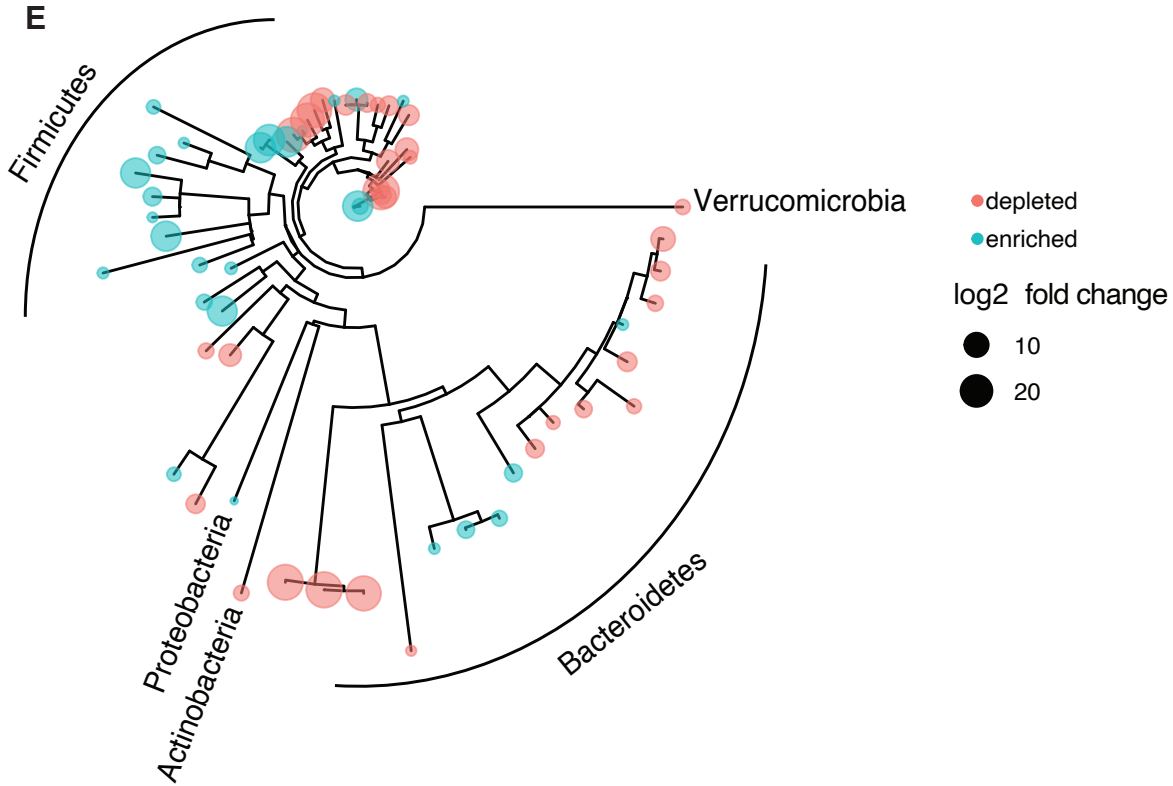

**Figure S4. MTX alters growth and community composition in complex gut microbial communities from RA patients, related to Figure 5.**

(A) Carrying capacity was significantly decreased among the 30 patient fecal suspensions *ex vivo* (paired Student's *t*-test) treated with MTX (100 µg/ml).

(B) Time to mid-exponential was significantly increased among the 30 patient fecal suspensions *ex vivo* (paired Student's *t*-test).

(C) Alpha diversity of Observed ASVs in *ex vivo* samples from 4 patients treated with either MTX or vehicle control (tested in quadruplicate; 24 hours after treatment). Linear mixed effects modeling revealed significant decrease in alpha diversity with MTX treatment.

(D) PCA of Euclidean distances on clr-transformed microbial abundances before ("pre", circles) and 1 month after ("post", triangles) initiation of MTX treatment based on 16S-seq. Each patient's samples are connected by a line. ANOSIM statistical results are shown for MTX treatment effect.



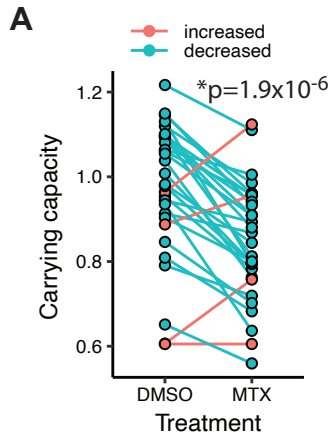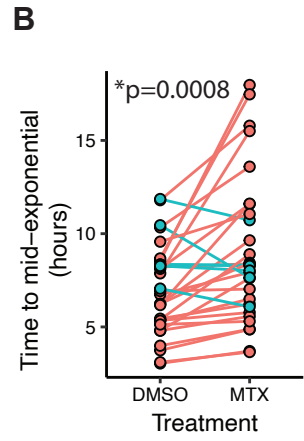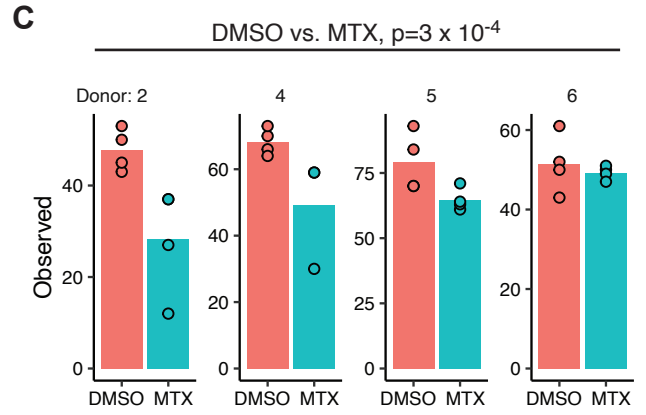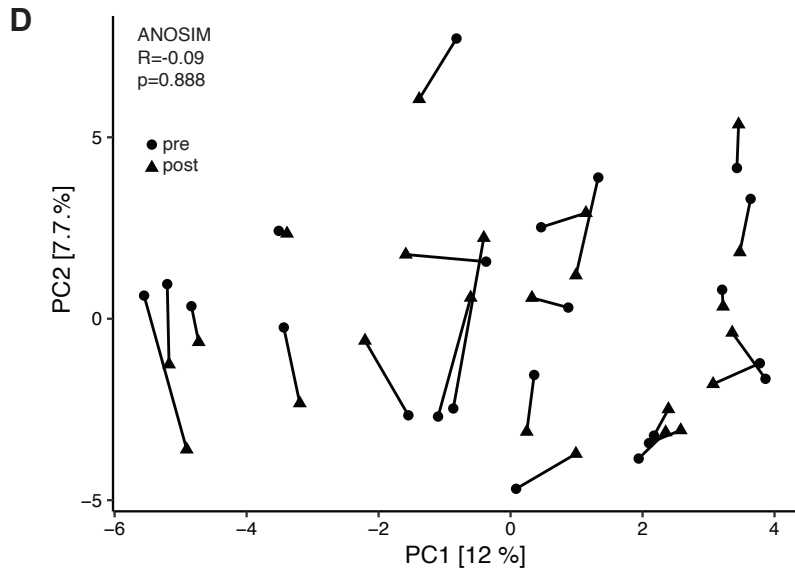

**Figure S5. Transplantation of RA patient microbiota in germ-free mice, related to Figure 6 and 7.**

(A) Design of a gnotobiotic transplant experiment in which fecal microbiota from a patient before (Pre) and 1 month after MTX treatment (Post) were transferred into germ-free C57BL/6J mice. A subset of mice were challenged with dextran sodium sulfate (DSS). This design was used to evaluate 3 donor transplantations.

(B) Representative colonic histology from mice colonized with pre-MTX or post-MTX microbiota with or without DSS in the drinking water with H&E staining at 8x magnification.

(C-E) Percent change in weight (C), endpoint colitis score (D) and colon length (E) in mice challenged with DSS after transplantation with pre-MTX and post-MTX microbiota from Donor 2. Significance assessed using Wilcoxon rank sum test.

(F) PCA of Euclidean distances of clr-transformed values for each transplant experiment, showing that mice receiving microbiota from each donor (gavage fluid) generally resemble the donor and are distinct from each other approximately 1 week after colonization.

(G) Relative abundance of each phylum in gavage fluid and in recipient mice (averaged over 10-12 mice per group). Phyla with relative abundance >0.01 are annotated.

(H-J) PCA of Euclidean distances using clr-transformed values of samples collected on days 3, 7, and 14 for transplanted mice from each donor. Each point represents a fecal sample. ANOSIM R and p values reported comparing pre-MTX and post-MTX groups on day 14.

(K) There were 41 ASVs that were differentially abundant in pre-MTX vs. post-MTX across the three donor FMT experiments ( $p_{\text{adj}} < 0.05$ , DESeq). Colors represent log<sub>2</sub> fold change.

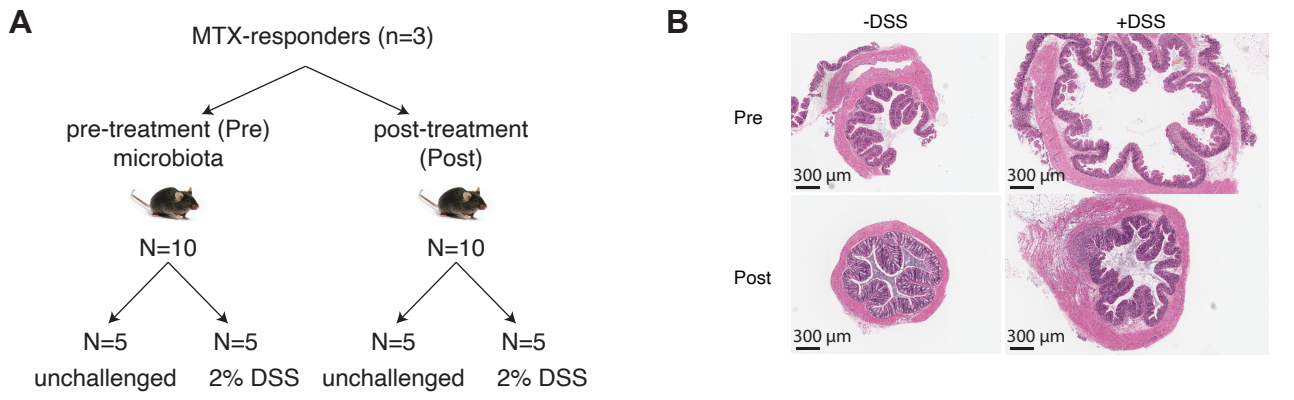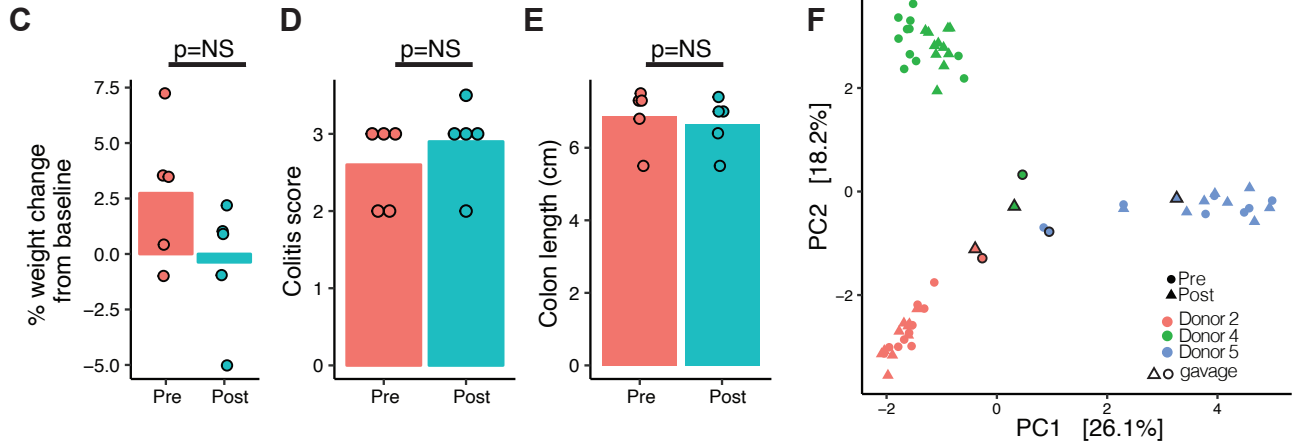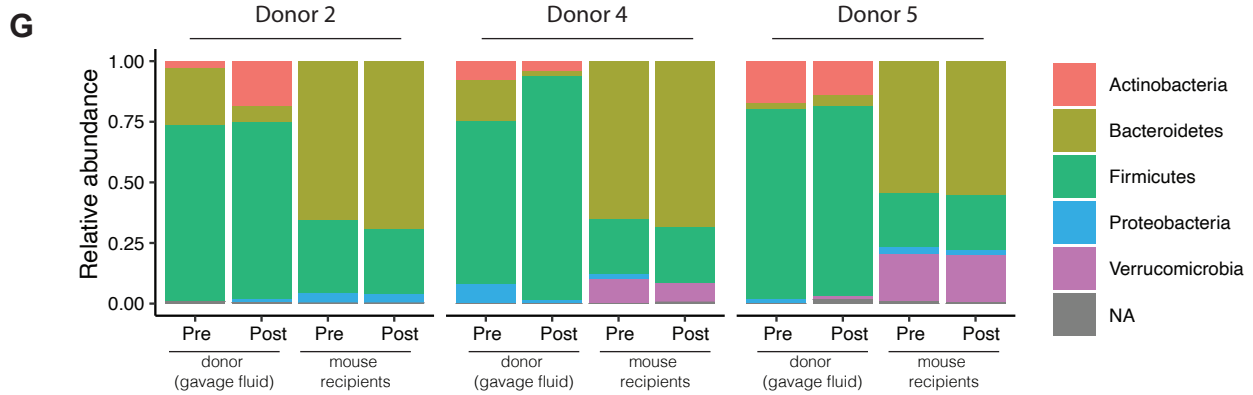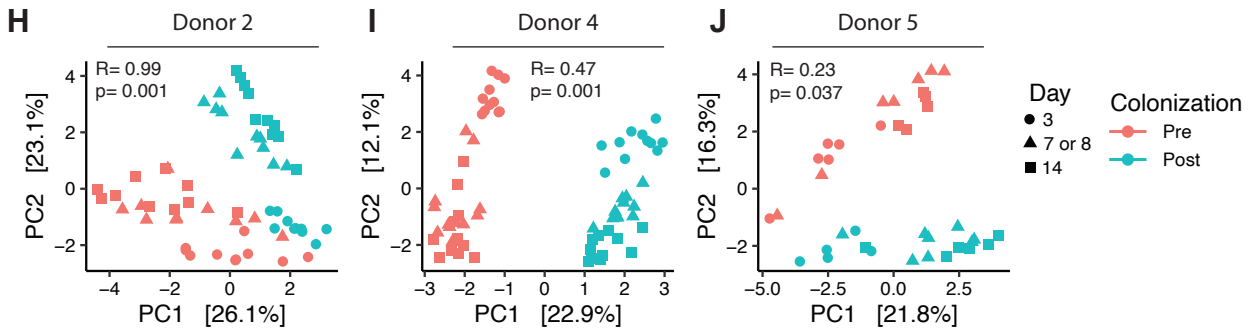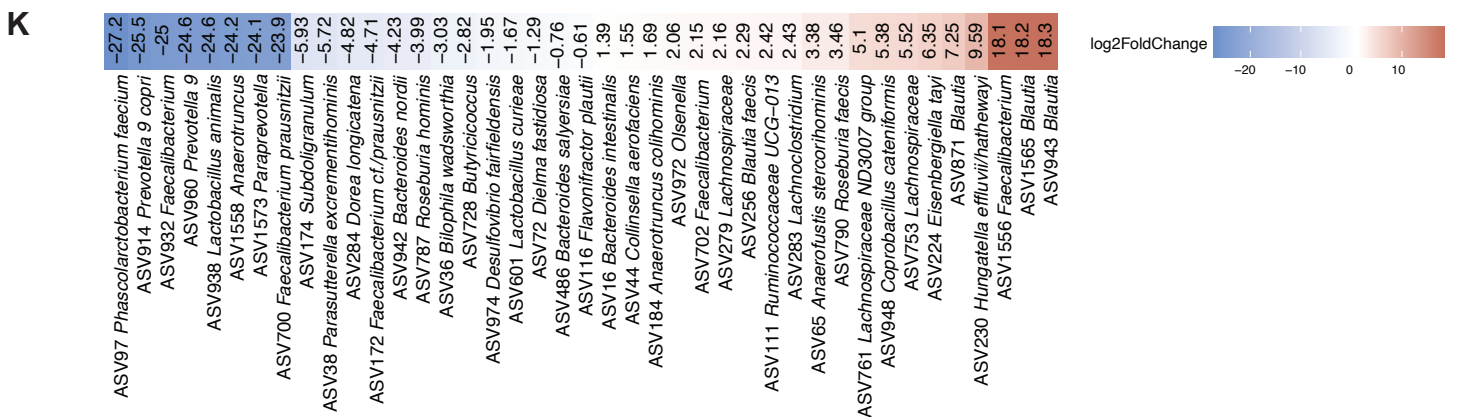

**Figure S6. Gating strategy and representative flow plots for immune populations in mice transplanted with microbiota from a patient before MTX treatment (M0, pre-MTX) and 1 month after treatment (M1, post-MTX) with or without DSS treatment, related to Figure 6 and 7.**

(A) Colonic and small intestinal lamina (SI) propria lymphocytes as well as splenocytes (Sp) were isolated and stained for flow cytometry analysis. Shown is the gating strategy.

(B-G) Representative flow plots are shown for the following: percentage of IFN- $\gamma$ <sup>+</sup> (B), Foxp3 (C), IL17-A<sup>+</sup> (D), and CD69<sup>+</sup> CD44<sup>+</sup> (E) cells within the CD3<sup>+</sup>CD4<sup>+</sup> T cell compartment are displayed. Representative flow plots for B220 B cells (F) and Gr1<sup>+</sup>CD11b<sup>+</sup> (G) myeloid cell populations are shown. Sp, spleen; SI, small intestine.

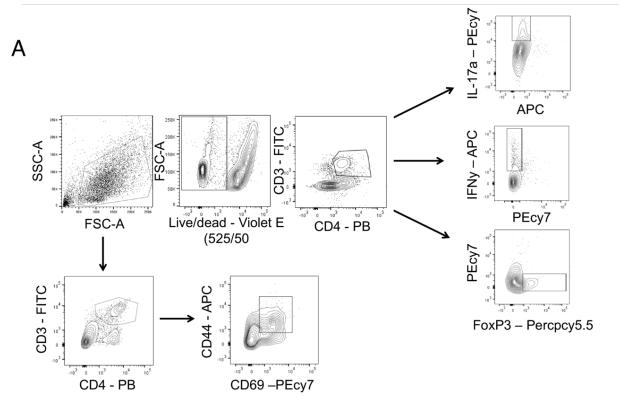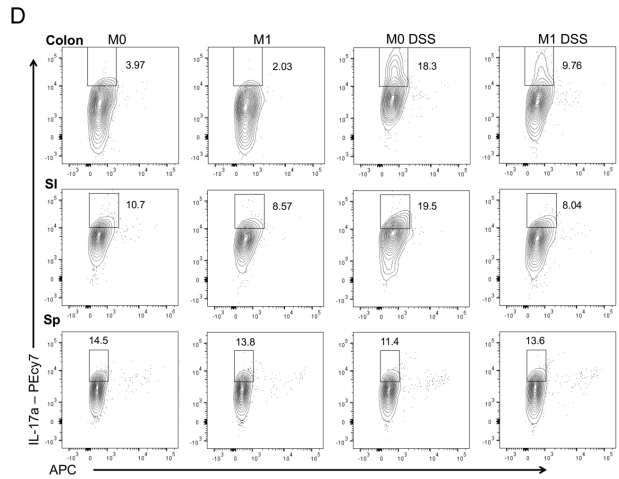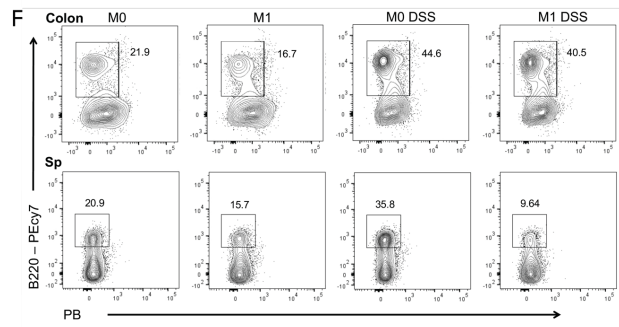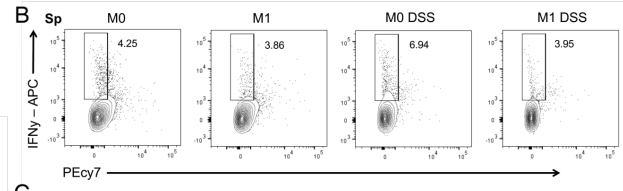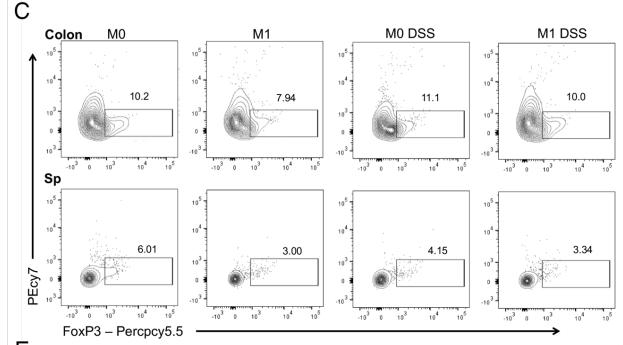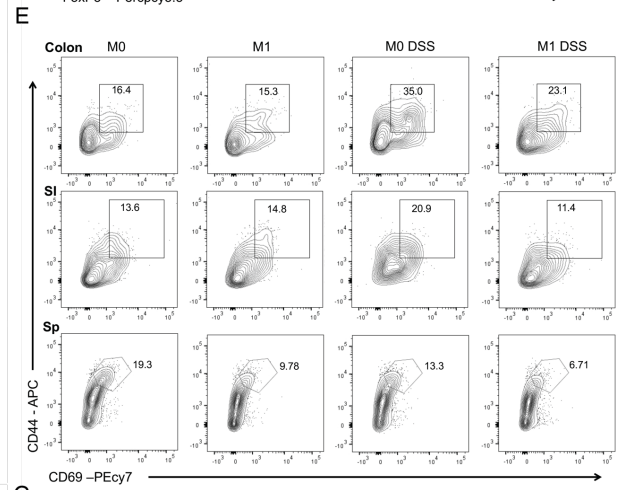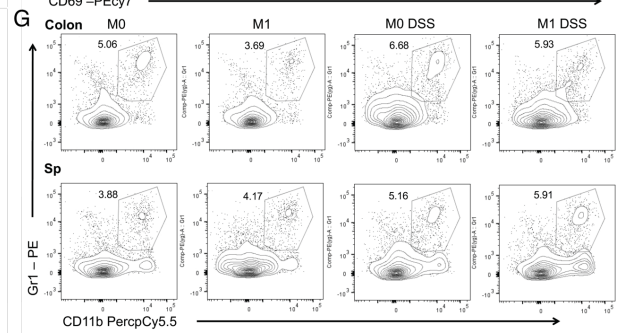

## SUPPLEMENTAL DATA FILES

### Data File S1. Growth curves of bacterial isolates with MTX with or without rescue agents, related to Figures 2 and 3.

(A-D) Representative growth curves from isolates treated with 10 concentrations of MTX. Included are growth and sterile controls as well. Each concentration was assessed in duplicate and both duplicates are plotted on the same graph. Bumps seen in the sterile controls (and in treatments without any growth) deviating from 0 are technical artifacts. Isolates (e.g., *E. rectale*, *D. longicatena*) with clumpy growth tend to produce variability in OD600 readings.

(A) Members of the Bacteroidetes phylum.

(B) Members of the Firmicutes phylum.

(C) Members of the Actinobacteria phylum.

(D) Members of multiple other phyla (Verrucomicrobia, Fusobacteria, Proteobacteria).

(E) Lack of a detectable correlation between MIC and estimated growth curve parameters of isolates grown in BHI+ media (in the absence of MTX).

(F-G) Bacterial isolates were treated with 9 concentrations of MTX and 7 concentrations of folic acid (F) or leucovorin (G) and growth was measured by optical density at OD600 every 15 minutes. Transient deviations from the baseline are technical artifacts.

**A**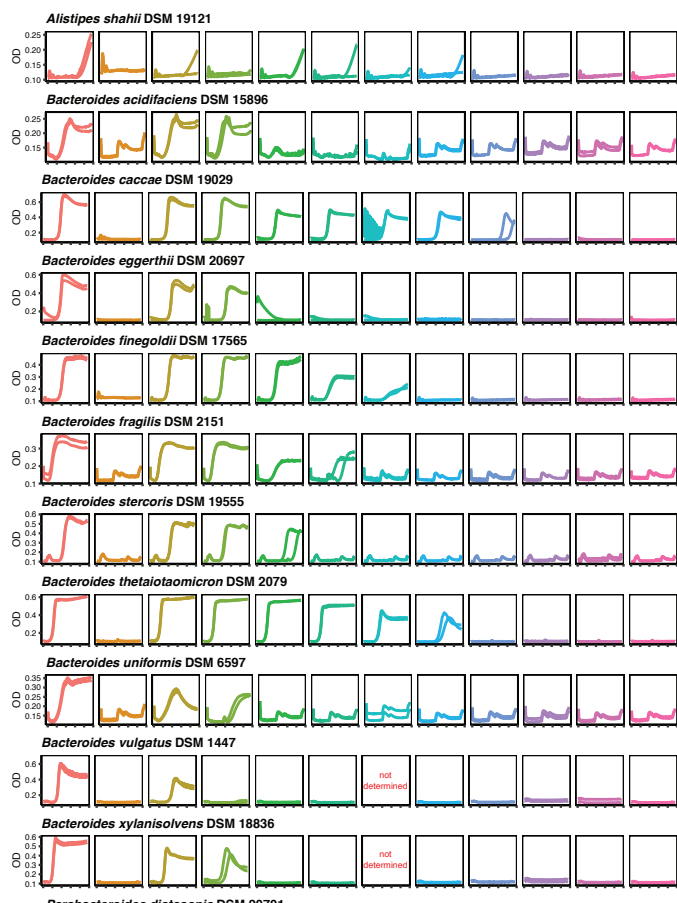**C**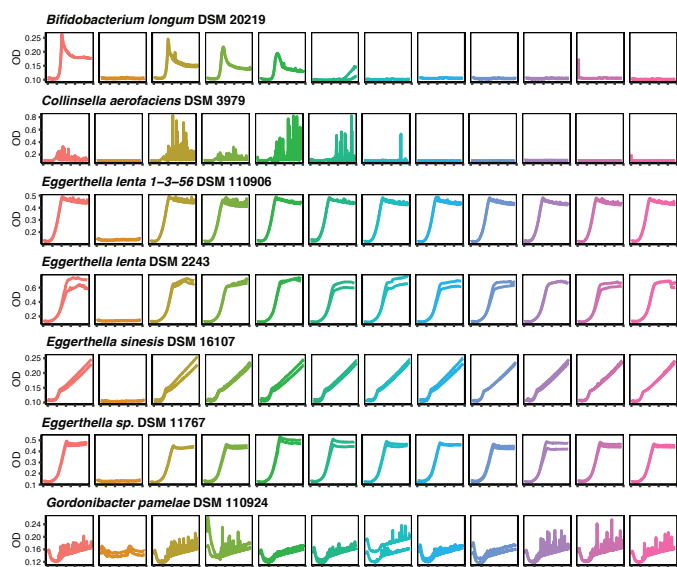**D**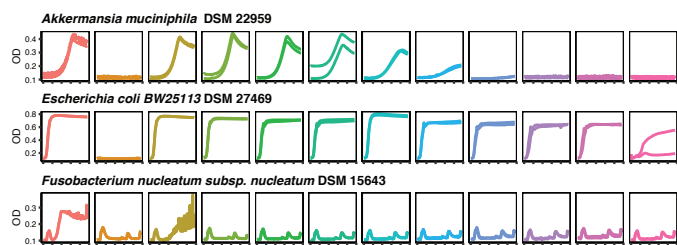**B**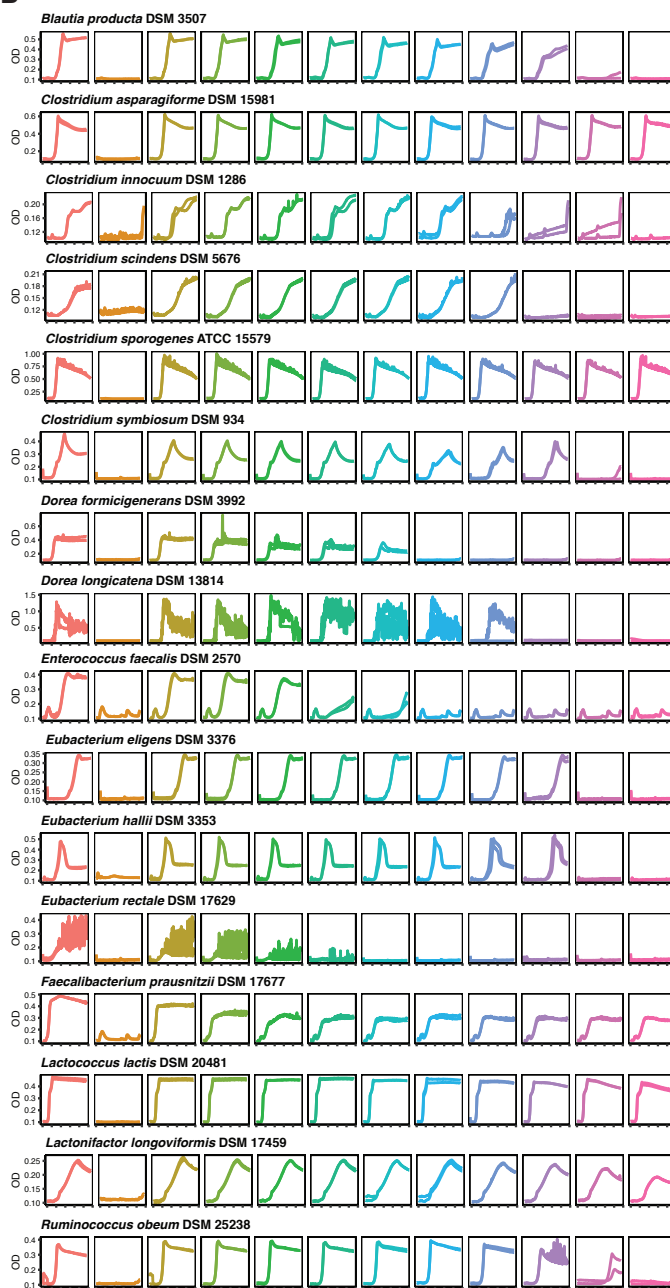

MTX concentration

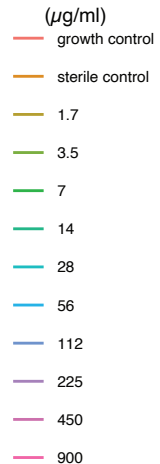**E**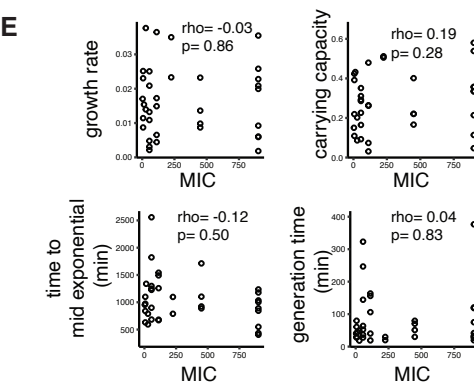

**F**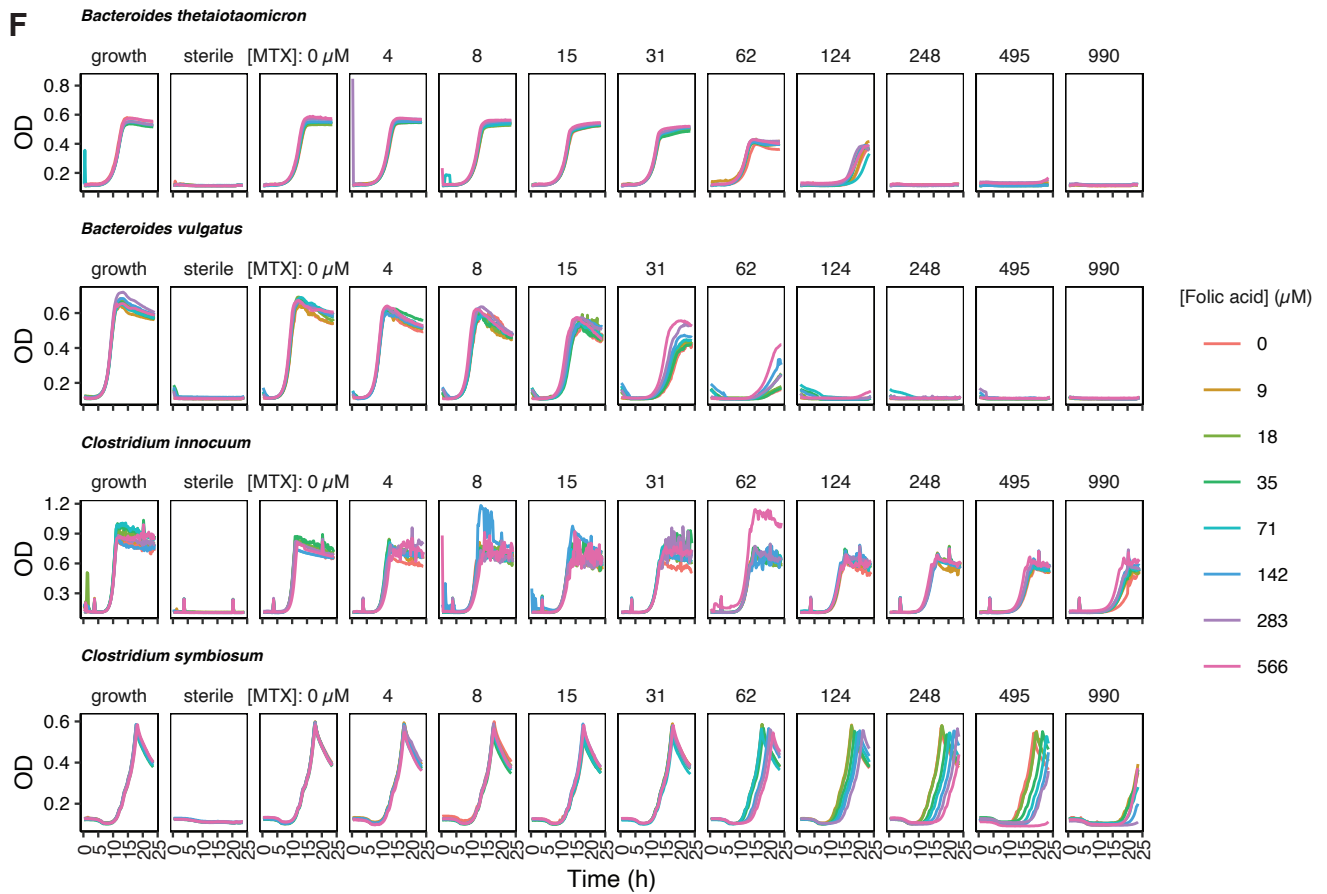**G**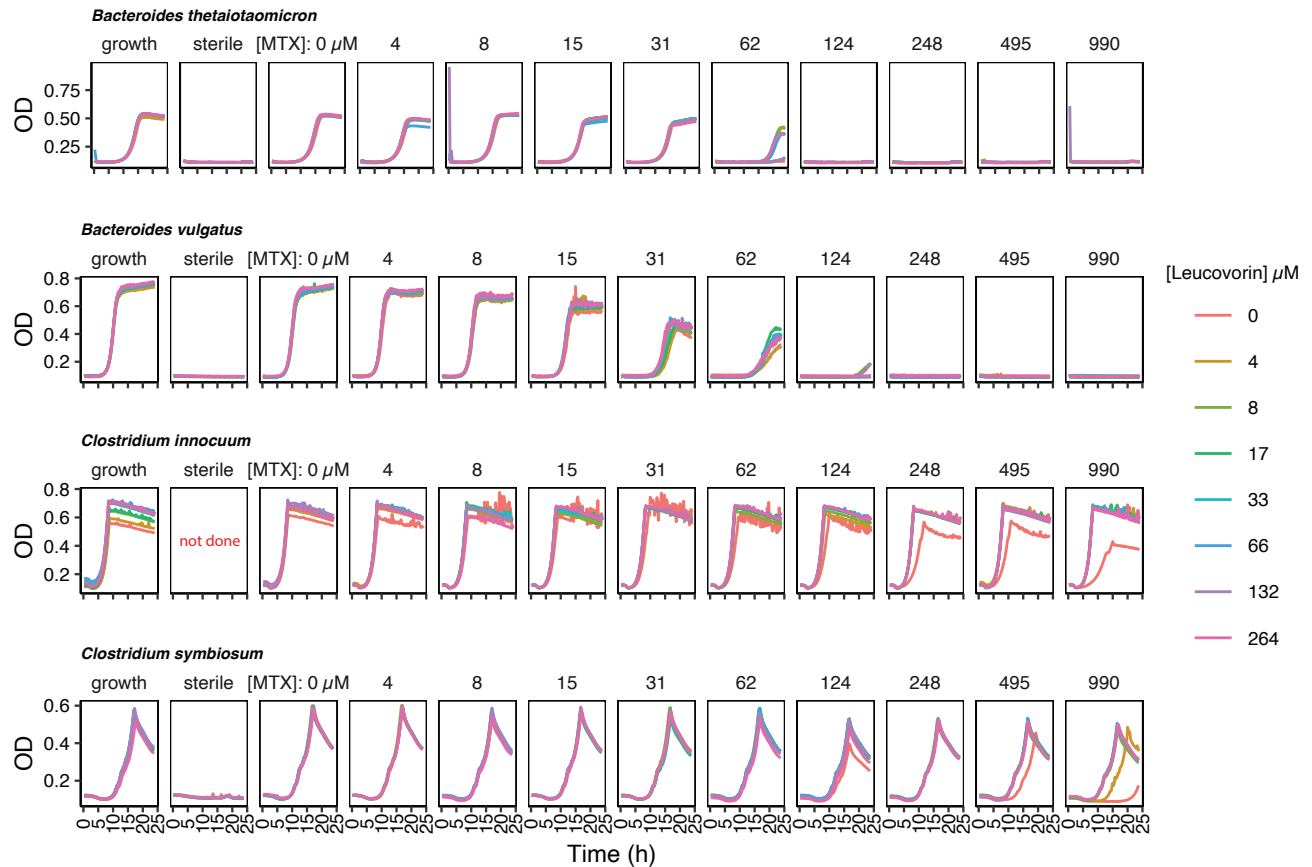

Supplement: NIHMS1655935-supplement-1.pdf [file NIHMS1655935-supplement-1.pdf]
